# Supplementary material for: Tetrahydrobiopterin (BH4) deficiency is associated with augmented inflammation and microvascular degeneration in the retina
Source: Springer Nature journal article supplement (doi:10.1186/s12974-017-0955-x), 2017-09-06

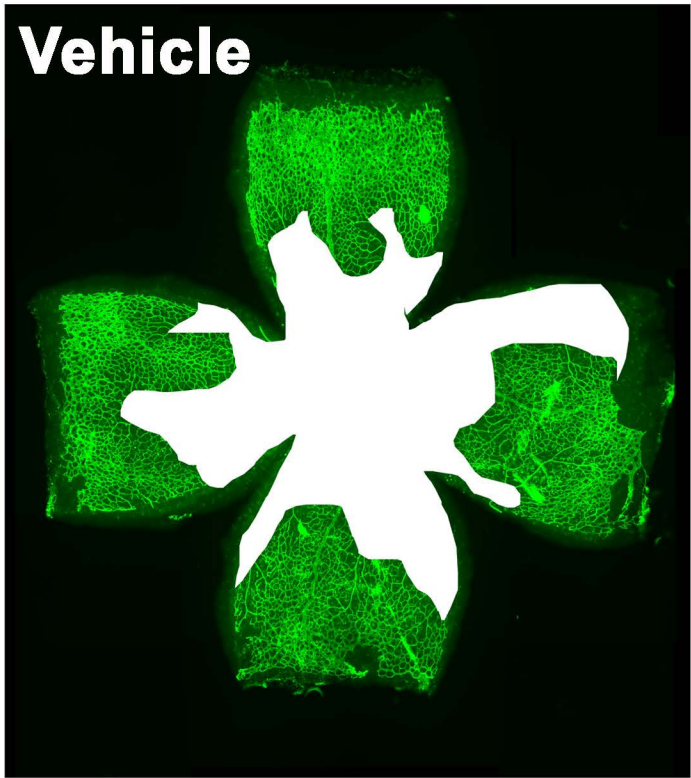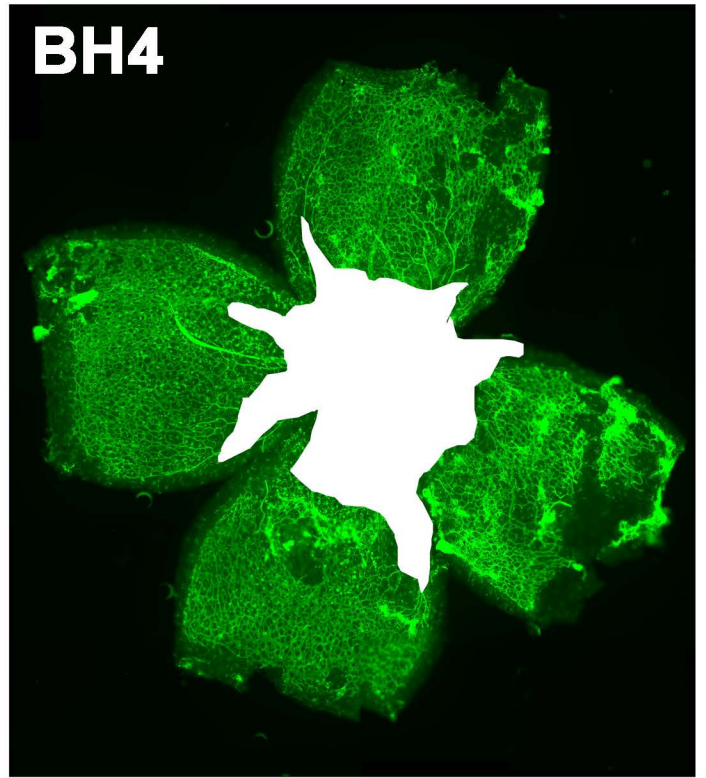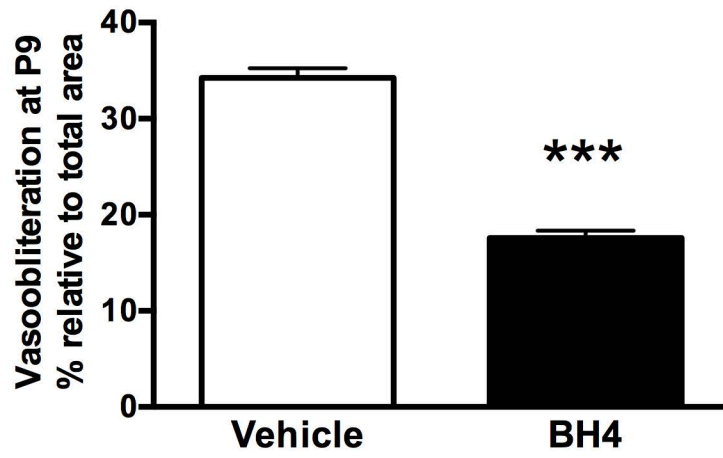

Supplement: MOESM7 [file 15018474]
